# Supplementary material for: In situ strain tuning of the metal-insulator-transition of Ca2RuO4 in angle-resolved photoemission experiments
Source: PubMed Central journal article supplement (PMC6208396; doi:10.1038/s41467-018-06945-0), 2018-10-31
Supplement: 41467_2018_6945_MOESM3_ESM.pdf [file 41467_2018_6945_MOESM3_ESM.pdf]

## Description of Additional Supplementary Files

File Name: Supplementary Data 1

Description: Supplementary Data file 1 contains the CIF file reporting the crystal structure determined by single crystal neutron diffraction of  $\text{Ca}_{2-x}\text{La}_x\text{RuO}_4$  with  $x = 0.11$  measured at 4 K.

File Name: Supplementary Data 2

Description: Supplementary Data file 2 contains the CIF file reporting the crystal structure determined by single crystal neutron diffraction of  $\text{Ca}_{2-x}\text{La}_x\text{RuO}_4$  with  $x = 0.07$  measured at 10 K.

File Name: Supplementary Data 3

Description: Supplementary Data file 3 contains the CIF file reporting the crystal structure determined by single crystal neutron diffraction of  $\text{Ca}_{2-x}\text{La}_x\text{RuO}_4$  with  $x = 0.07$  measured at 300 K.

File Name: Supplementary Data 4

Description: Supplementary Data file 4 contains the CIF file reporting the crystal structure determined by single crystal neutron diffraction of  $\text{Ca}_{2-x}\text{Pr}_x\text{RuO}_4$  with  $x = 0.07$  measured at 10 K.

File Name: Supplementary Data 5

Description: Supplementary Data file 5 contains the CIF file reporting the crystal structure determined by single crystal neutron diffraction of  $\text{Ca}_{2-x}\text{Pr}_x\text{RuO}_4$  with  $x = 0.07$  measured at 300 K.

File Name: Supplementary Data 6

Description: Supplementary Data file 6 contains the CIF file reporting the crystal structure determined by single crystal neutron diffraction of  $\text{Ca}_{2-x}\text{La}_x\text{RuO}_4$  with  $x = 0.04$  measured at 10 K.

File Name: Supplementary Data 7

Description: Supplementary Data file 7 contains the CIF file reporting the crystal structure determined by single crystal neutron diffraction of  $\text{Ca}_{2-x}\text{La}_x\text{RuO}_4$  with  $x = 0.04$  measured at 300 K.

File Name: Supplementary Data 8

Description: Supplementary Data file 8 contains the CIF file reporting the crystal structure determined by single crystal neutron diffraction of  $\text{Ca}_{2-x}\text{Nd}_x\text{RuO}_4$  with  $x = 0.04$  measured at 300 K.

File Name: Supplementary Data 9

Description: Supplementary Data file 9 contains the CIF file reporting the crystal structure determined by single crystal neutron diffraction of  $\text{Ca}_{2-x}\text{Nd}_x\text{RuO}_4$  with  $x = 0.04$  measured at 10 K.

File Name: Supplementary Data 10

Description: Supplementary Data file 10 contains the CIF file reporting the crystal structure determined by single crystal neutron diffraction of  $\text{Ca}_{2-x}\text{Pr}_x\text{RuO}_4$  with  $x = 0.04$  measured at 10 K.

File Name: Supplementary Data 11

Description: Supplementary Data file 11 contains the CIF file reporting the crystal structure determined by single crystal neutron diffraction of  $\text{Ca}_{2-x}\text{Pr}_x\text{RuO}_4$  with  $x = 0.04$  measured at 300 K.

File Name: Supplementary Data 12

Description: Supplementary Data file 12 contains the CIF file reporting the crystal structure determined by single crystal neutron diffraction of  $\text{Ca}_2\text{RuO}_4$  measured at 10 K.

File Name: Supplementary Data 13

Description: Supplementary Data file 13 contains the CIF file reporting the crystal structure determined by single crystal neutron diffraction of  $\text{Ca}_2\text{RuO}_4$  measured at 300 K.
